# Supplementary material
Source: Research Square preprint supplement (doi:10.21203/rs.3.rs-9128818/v1)
Supplement: Supplementary file 1 [file 04b40f8b765ff5dfe12714dd.docx]

Writing Methods Instruction in Teacher Preparation Programs

Definitions for terms as they are used in this survey:

Preservice teacher/teacher candidate/future educator: An individual enrolled in a teacher preparation program which will result in certification as an elementary and/or special education teacher. Elementary certification is intended to include kindergarten through sixth grade, so this may involve more than one certification track in your state.

Teacher Preparation Program (TPP): A program at an Institution of Higher Education (IHE) that prepares future educators for certification as elementary and/or special education teachers.

Writing methods instruction: Instruction that addresses varying aspects of how to teach writing. This may include one or more of the following: Writing theory (e.g., cognitive, social construction, etc.), transcription skills (e.g., handwriting including letter formation, keyboarding/typing, spelling, and mechanics), and translation skills including grammar, semantics, sentence structure or syntax, writing processes, and genre study. It may also include assessment, reading-writing connections, classroom practices, adaptations, and writing problems or disabilities.

Q1 Please provide the following information.

- Name of IHE
- Name of academic unit (college, school or department) offering the teaching degree or certificate/endorsement
- Please provide your name, title and role here, in case multiple people from your IHE respond to this survey

Q2 Is the IHE a public or private institution?

- Public
- Private

Q3 Which degree(s) can a preservice teacher who completes your IHE's TPP for elementary or special education teacher certification receive? Select all that apply. If applicable, below each degree please list all subjects in which a preservice teacher can earn a degree for a major outside of education.

- Bachelor of Arts
- Bachelor of Education
- Bachelor of Science
- Master of Arts
- Master of Education
- Master of Science
- Education Specialist
- Other

Q4 Is your TPP accredited?

- Yes, by the Council for the Accreditation of Educator Preparation (CAEP)
- Yes, by the Association for Advancing Quality in Educator Preparation (AAQEP)
- Yes, by other (please identify)
- No, it is not accredited

Q5 What is the duration of the typical undergraduate program/course of study to complete the TPP for teacher certification, including the time to complete any preservice student teaching, internship, or practicum requirements? One year is defined as an academic year including fall/spring semesters or fall/winter/spring trimesters.

- Less than 4 years
- 4 years
- More than 4 but less than 5 years
- 5 years
- More than 5 years
- Other
- Our TPP does not offer an undergraduate degree

Q6 What is the duration of the typical graduate program/course of study (masters or education specialist degree) to complete the TPP for teacher certification, including the time to complete any internship or practicum requirements? One year is defined as an academic year including fall/spring semesters or fall/winter/spring trimesters.

- Less than 1 year
- 1 year
- More than 1 but less than 2 years
- 2 years
- More than 2 but less than 3 years
- 3 years
- More than 3 years
- Other
- Our TPP does not offer a graduate degree

Q7 Are preservice teachers required to teach writing in any capacity in conjunction with their student teaching internship/practicum experience?

- Yes
- No
- Other

Q8 Does your state require preservice teachers to pass an assessment demonstrating an understanding of writing methods instruction as a condition of certification or renewal? Select all that apply.

- Yes, for new elementary certified teachers
- Yes, for elementary certificate renewal
- Yes, for new special education certified teachers
- Yes, for special education certificate renewal
- No
- Other

Q9 Are students in your elementary or special education TPP required to take a course that includes writing methods instruction?

- Yes, for both elementary and special education certification
- Only for elementary certification
- Only for special education certification
- No

Q10 This question seeks information about required and elective courses offered in your TPP that include writing methods instruction. You will see the two types of teaching certification, elementary and special education, listed in the left column. For each type of certification, write the number of courses that fit the description written in each column heading. If no courses are offered for a category, enter 0.

|  | Required course(s) devoted solely to writing methods instruction (1) | Elective course(s) devoted solely to writing methods instruction (2) | Required reading or literacy methods course(s) with embedded writing methods instruction (3) | Required content area methods course(s) (e.g., math, social studies, science) with embedded writing methods instruction (4) |
| --- | --- | --- | --- | --- |
| Elementary certification (1) |  |  |  |  |
| Special education certification (2) |  |  |  |  |

Display This Question:

If If This question seeks information about required and elective courses offered in your TPP that incl... Text Response Is Greater Than 0

Or Or This question seeks information about required and elective courses offered in your TPP that incl... Text Response Is Greater Than 0

Or Or This question seeks information about required and elective courses offered in your TPP that incl... Text Response Is Greater Than 0

Or Or This question seeks information about required and elective courses offered in your TPP that incl... Text Response Is Greater Than 0

Q11 For up to three required or elective courses devoted solely to writing methods instruction, please provide each course title, number, and semester when each course will be taught next.

- Course 1 title and number
- When will course 1 be taught next?
- Course 2 title and number
- When will course 2 be taught next?
- Course 3 title and number
- When will course 3 be taught next?

Display This Question:

If If This question seeks information about required and elective courses offered in your TPP that incl... Text Response Is Greater Than 0

Or Or This question seeks information about required and elective courses offered in your TPP that incl... Text Response Is Greater Than 0

Or Or This question seeks information about required and elective courses offered in your TPP that incl... Text Response Is Greater Than 0

Or Or This question seeks information about required and elective courses offered in your TPP that incl... Text Response Is Greater Than 0

Q12 Please upload a syllabus for each course devoted to writing methods instruction. If there is more than one course, please condense the syllabi in a zip file and then upload the zipped file.

Display This Question:

If If This question seeks information about required and elective courses offered in your TPP that incl... Text Response Is Greater Than 0

Or Or This question seeks information about required and elective courses offered in your TPP that incl... Text Response Is Greater Than 0

Or Or This question seeks information about required and elective courses offered in your TPP that incl... Text Response Is Greater Than 0

Or Or This question seeks information about required and elective courses offered in your TPP that incl... Text Response Is Greater Than 0

Q13 For up to four reading, literacy, or content area methods courses that embed writing methods instruction, please provide each course title, number, and the semester when each course will be taught next.

- Course 1 title and number
- When will course 1 be taught next?
- Course 2 title and number
- When will course 2 be taught next?
- Course 3 title and number
- When will course 3 be taught next?
- Course 4 title and number
- When will course 4 be taught next?

Display This Question:

If If This question seeks information about required and elective courses offered in your TPP that incl... Text Response Is Greater Than 0

Or Or This question seeks information about required and elective courses offered in your TPP that incl... Text Response Is Greater Than 0

Or Or This question seeks information about required and elective courses offered in your TPP that incl... Text Response Is Greater Than 0

Or Or This question seeks information about required and elective courses offered in your TPP that incl... Text Response Is Greater Than 0

Q14 Please upload a syllabus for each reading, literacy, or content area course with embedded writing methods instruction. If there is more than one course, please condense the syllabi in a zip file and then upload the zipped file.

The following questions relate to the content of the writing methods instruction courses identified in previous questions, whether writing methods instruction is the sole topic of the course or is embedded. For each question, select all responses that apply.

Q16 Please select all writing theories covered in any courses previously identified.

- Sociocultural theory
- Cognitive process theory
- Social cognitive theory
- Other: please identify any additional theories
- ⊗Theory is not included in writing methods instruction

Q17 Transcription skills include handwriting (including letter formation), spelling, mechanics, keyboarding or typing, and computer or other technology use. Please select all transcription skills for which instruction is included in any courses.

- Handwriting (including letter formation)
- Spelling
- Mechanics (e.g., capitalization and punctuation)
- Keyboarding/Typing
- Computer technology use (word processing, etc.)
- Other
- ⊗None of the above

Q18 Translation skills are grounded in oral language and include grammar, semantics, syntax, and writing processes. Please select the translation skills for which instruction is included in any courses.

- Parts of speech (e.g., noun, verb, adjective, etc.)
- Sentence structure/syntax (e.g., sentence formation, types, word order, sentence expansion and sentence combining)
- Morphology (smallest parts of words with meaning, e.g., root, base, prefix, suffix)
- Vocabulary use in context
- Writing process - planning
- Writing process - writing/drafting
- Writing process - revising and editing
- Writing process - publishing
- Other
- ⊗None of the above

Q19 Translation skills also include genre studies, text structures, purposes of writing, and audience awareness. Please select all translation skills for which instruction is included in any courses.

- Purposes of writing
- Audience awareness
- Narrative/story
- Informative/expository
- Opinion/argument
- Poetry
- Other
- ⊗None of the above

Q20 Writing methods instruction may include assessing student writing. Please select all assessment practices covered in any courses.

- Utilizing rubrics
- Verbal or written feedback provided during the writing process from peers
- Verbal or written feedback provided during the writing process from adults (e.g., teacher conferencing)
- Evaluations of writing performance are based on multiple samples of different types of writing, using consistent scoring methods and multiple evaluators
- Other
- ⊗None of the above

Q21 Writing methods instruction may include a focus on the connection between reading and writing. Please select all practices covered in any courses.

- Taking notes
- Summarization instruction (how to summarize text through explicit and systematic instruction)
- Inquiry instruction (teach how to develop content for writing by analyzing data derived from investigations/experimentation, textual/source analysis, or already provided information)
- Writing in response to text (brief questions and answers as well as more extended responses)
- Writing to learn (writing is a mechanism for learning content area or topical information
- Other
- ⊗None of the above

Q22 Writing methods instruction may include practices related to strategy instruction. Please select all instructional practices and/or identify specific strategy models covered in any courses.

- Comprehensive writing instruction (writing process plus strategy instruction, skill instruction and/or text structure instruction)
- Strategy instruction (explicit and systematic instruction, through modeling and guided practice with feedback, for any stage of the writing process, with the goal of independent strategy use)
- Self-regulation and metacognitive reflection (regulate the quality and productivity of writing or content learning through monitoring, reflection, and evaluation of behaviors and performance through tracking such as graphing)
- Setting product goals (set observable, specific, and individual goals for what students will accomplish in their writing)
- One or more specific strategy models (please identify strategy model(s), e.g., Strategic Instruction Model (SIM), Brain Frames, etc.)
- Other
- ⊗None of the above

Q23 Writing methods instruction may include other classroom practices. Please select all classroom practices covered in any courses.

- Provide extra time for writing
- Free writing (writing without concern for grading)
- Peer collaboration
- Teacher modeling
- Creativity/imagery instruction
- Utilizing text models
- Authentic and relevant writing tasks (writing activities are personally relevant for students and serve authentic purposes and audiences)
- Motivation (teachers reinforce positive student attitudes and beliefs toward writing)
- Other
- ⊗None of the above

Q24 Writing methods instruction may include recognizing when students experience writing difficulties and adapting instruction accordingly. Please select all applicable topics covered any courses.

- Adaptations for the environment (e.g., computer or technology use)
- Adaptations for tasks and materials (e.g., choice of topic, alternate assignment)
- Adaptations for instruction (e.g., additional instruction in spelling, grammar, mechanics based on individual writer's needs)
- Adaptations for evaluation to accommodate individual writer's needs (e.g., grades based on effort, conferencing, feedback)
- Spelling errors that may be indicative of other literacy acquisition concerns
- Dysgraphia (a writing disorder resulting in impaired handwriting and/or spelling, without reading or fine motor problems)
- Other
- ⊗None of the above

Q25 We know your time is valuable. If there is any other information you would like to share or expand upon, including whether there are planned changes to your program in the future, please include the information in the box below.
